# Supplementary material for: Necklace-like NiCo2O4@carbon composite nanofibers derived from metal–organic framework compounds for high-rate lithium storage
Source: Royal Society of Chemistry journal article supplement (doi:10.1039/d1qm00398d), 2021-01-01
Supplement: d1qm00398d1.pdf [file d1qm00398d1.pdf]

## Supporting Information

# Necklace-like $\text{NiCo}_2\text{O}_4$ @carbon composite nanofibers derived from metal-organic framework compounds for high rate lithium storage

Zhiwen Long<sup>a,1</sup>, Rongrong Li<sup>a,1</sup>, Zixin Dai<sup>a</sup>, Chu Shi<sup>a</sup>, Caiqin Wu<sup>a</sup>, Qufu Wei<sup>a</sup>,  
Hui Qiao<sup>a,\*</sup>, Keliang Wang<sup>b,\*</sup>, Ke Liu<sup>c,\*</sup>

<sup>a</sup> Key Laboratory of Eco-textiles, Ministry of Education, Jiangnan University, Wuxi 214122, China

<sup>b</sup> Fraunhofer USA, Inc., Center for Midwest, Division for Coatings and Diamond Technologies, Michigan State University, East Lansing, MI 48824, USA

<sup>c</sup> Hubei Key Laboratory of Low Dimensional Optoelectronic Material and Devices, Hubei University of Arts and Science, Xiangyang, Hubei 441053, China

<sup>1</sup> Authors Zhiwen Long and Rongrong Li contributed equally.

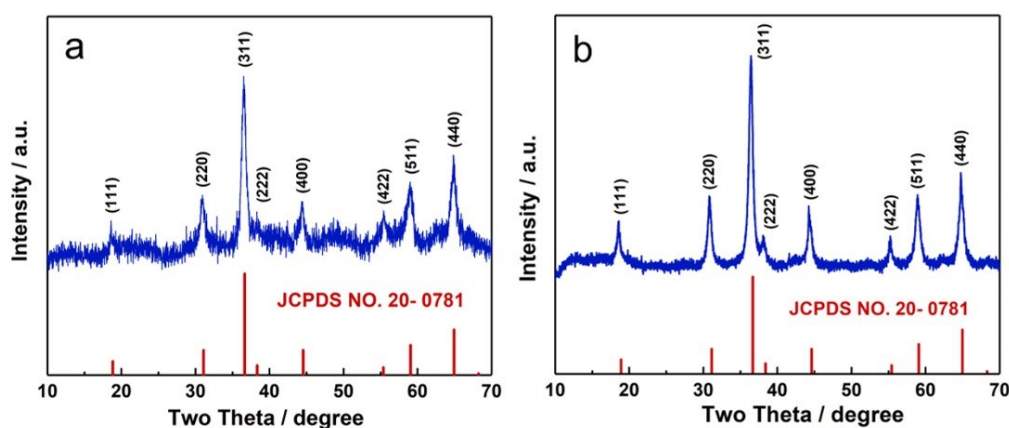

\* Corresponding author. Tel/Fax: +86-510-8591-2009

E-mail: [huiqiao@jiangnan.edu.cn](mailto:huiqiao@jiangnan.edu.cn) (H. Qiao), [klwang@msu.edu](mailto:klwang@msu.edu) (K. L. Wang),  
[liuk1981@126.com](mailto:liuk1981@126.com) (K. Liu)

**Fig. S1** XRD patterns of NCO@C-82 (a) and NCO@C-88 (b) composite nanofibers

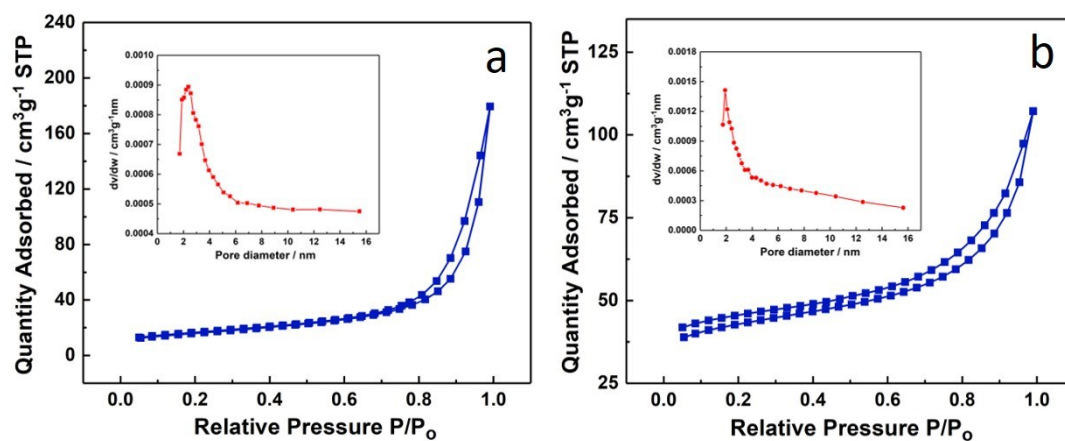

**Fig. S2** Specific surface areas of NCO@C-82 (a) and NCO@C-88 (b) composite nanofibers

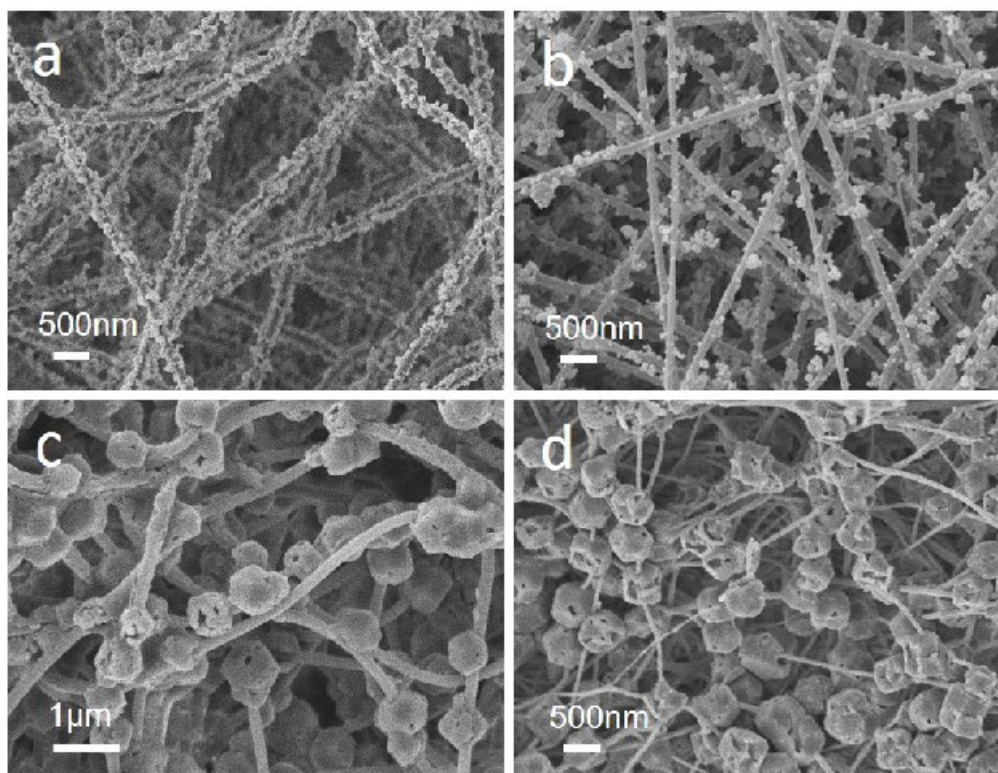

**Fig. S3** SEM images of ZIF/PAN-Ni-82 (a), NCO@C-82 (b), ZIF/PAN-Ni-88 (c) and NCO@C-88 (d) composite nanofibers.

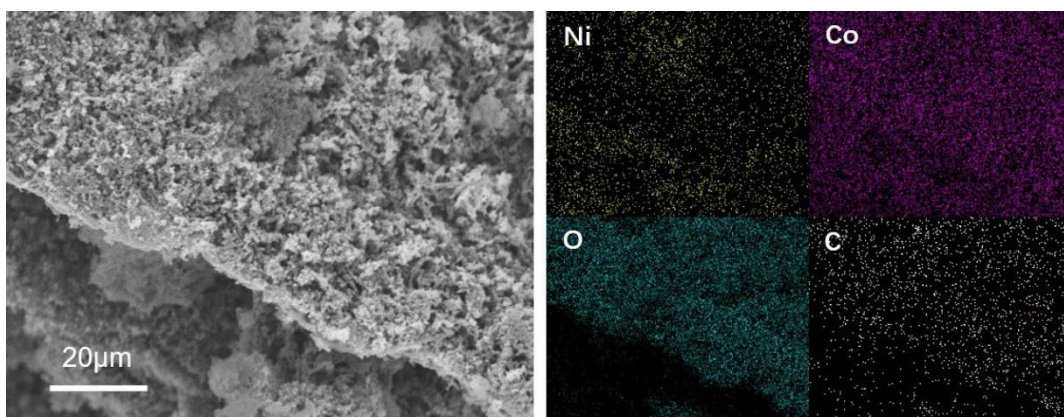

**Fig. S4** EDS elemental mapping of Ni, Co, O and C for NCO@C-86 nanofibers.

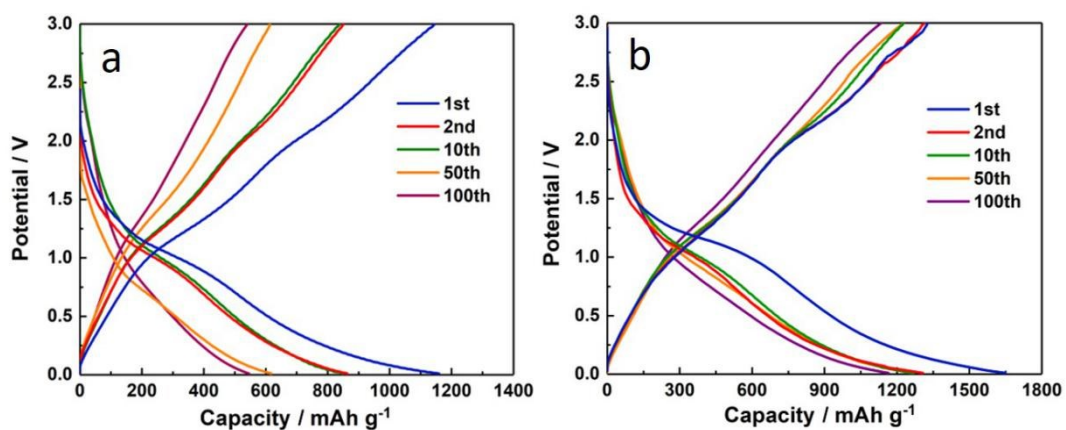

**Fig. S5** Charge-discharge curves of NCO@C-82 (a) and NCO@C-88 (b) composite nanofibers

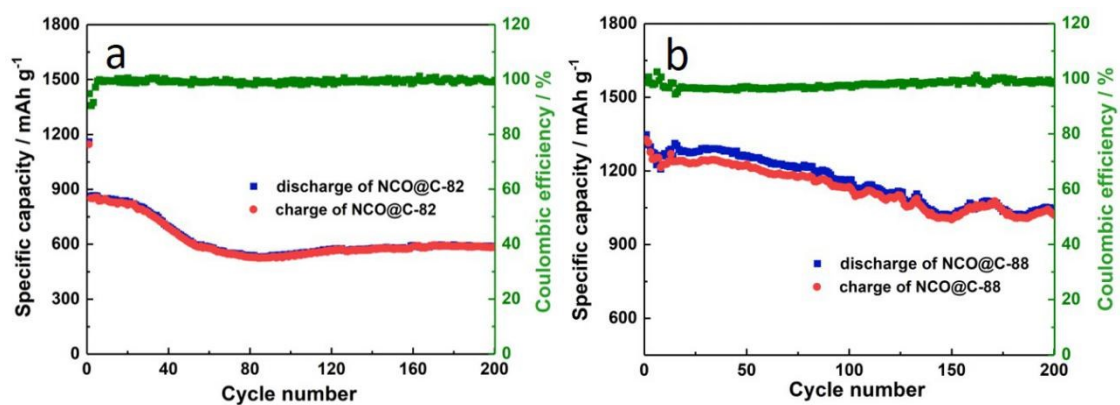

**Fig. S6** Cycling performance of NCO@C-82 (a) and NCO@C-88 (b) composite

nanofibers

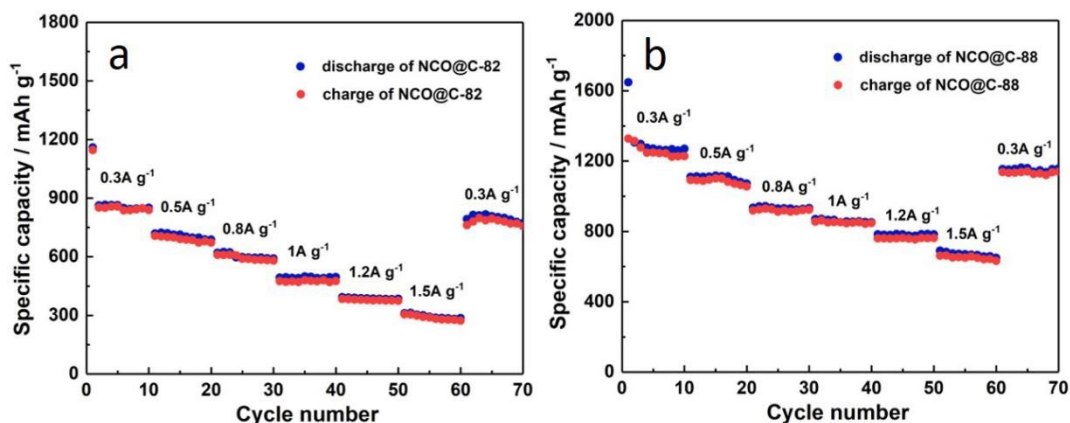

Fig. S7 Rate performances of NCO@C-82 (a) and NCO@C-88 (b) composite

nanofibers

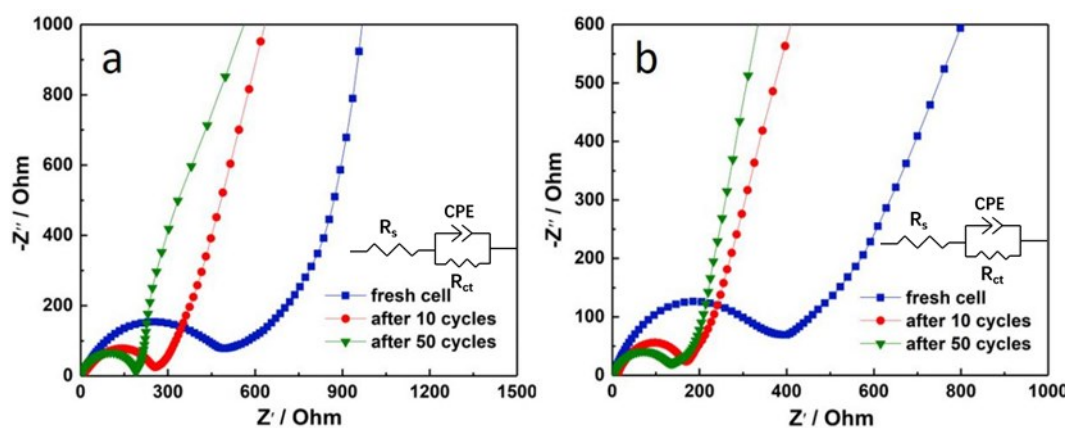

Fig. S8 Electrochemical impedance spectra and equivalent circuit model of NCO@C-82 (a) and NCO@C-88 (b) composite nanofibers

#### Rate performance of NCO@C-82 and NCO@C-88 electrodes:

The capacities of NCO@C-82 nanofibers (Fig. S7a) were only 850, 688, 591, 496 and 385 mAh g<sup>-1</sup> when increasing the current density from 0.3 to 1.2 A g<sup>-1</sup>. And the capacity decreased to 286 mAh g<sup>-1</sup> at 1.5 A g<sup>-1</sup>, which even inferior to that of graphite (372 mAh g<sup>-1</sup>). However, when the current density reverted to 0.3 A g<sup>-1</sup>, the capacity returned to 772 mAh g<sup>-1</sup> as well. By contrast, the rate performance of NCO@C-88

nanofibers (**Fig. S7b**) was much better than that of NCO@C-82, the capacity retention of 1270, 1072, 933, 853, 783, 650 and 1158 mAh g<sup>-1</sup> corresponding to the current densities of 0.3, 0.5, 0.8, 1, 1.5, 2 and 0.3 A g<sup>-1</sup>, respectively. It was worth noting that the NCO@C-86 nanofibers maintained stable capacity at every stage and delivered much higher reversible capacity than NCO@C-46, NCO@C-82 and NCO@C-88 nanofibers.

#### **Electrochemical impedance spectra of NCO@C-82 and NCO@C-88 electrodes:**

The NCO@C-82 electrode (**Fig. S8a**) displayed resistances of 490 Ω, 255 Ω and 190 Ω before cycling, after 10 cycles and 50 cycles, respectively. The NCO@C-82 electrode showed resistance of 490 Ω before cycling, and the resistance dropped down to 255 Ω after 10 cycles, and 190 Ω after 50 cycles. By contrast, the resistance of NCO@C-88 (**Fig. S8b**) was much lower than that of NCO@C-82 before cycling (400 Ω), after 10 cycles (170 Ω) and 50 cycles (135 Ω). Although the same trend of decreasing resistance for NCO@C-46, NCO@C-82, and NCO@C-88 was presented after cycling, they were still higher than that of NCO@C-86 at the corresponding stage.

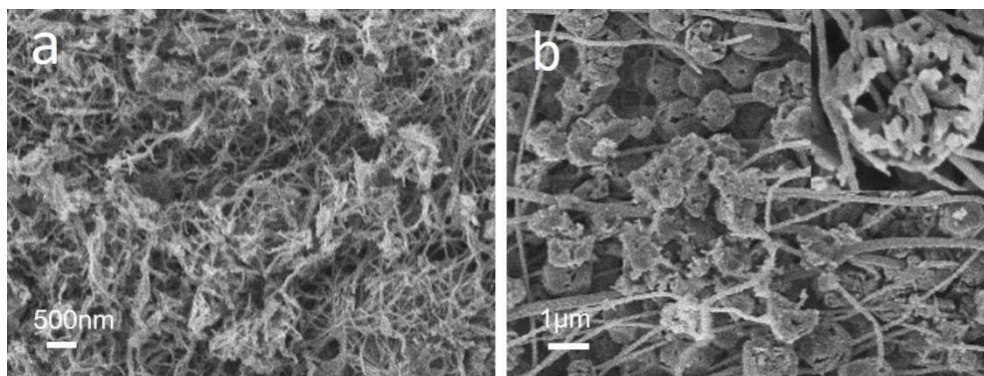

**Fig. S9** SEM images of ZIF/PAN-Ni-82 (a) and NCO@C-88 (b) composite nanofibers after 200 cycles
